# Supplementary material for: Spectroscopically tracking charge separation in polymer : fullerene blends with a three-phase morphology
Source: Royal Society of Chemistry journal article supplement (doi:10.1039/c5ee01713k), 2015-01-01
Supplement: c5ee01713k1.pdf [file c5ee01713k1.pdf]

**Electronic Supplementary Information for:**  
**Spectroscopically tracking charge separation in polymer:fullerene  
blends with three phase morphology**

J. K. Gallaher,<sup>a,b</sup> Shyamal K. K. Prasad,<sup>a,b</sup> M. A. Uddin,<sup>c</sup> T. Kim,<sup>d</sup> J. Y. Kim,<sup>d</sup> H.Y. Woo,<sup>\*c</sup> and J. M. Hodgkiss<sup>\*a,b</sup>

**Contents:**

|                                     |             |
|-------------------------------------|-------------|
| Device characteristics .....        | Fig. S1     |
| 2D-GIXRD data.....                  | Fig. S2-4   |
| Intensity dependent TA.....         | Fig. S5-6   |
| Polymer:fullerene with ODT TA ..... | Fig. S7-8   |
| Charge recombination kinetics.....  | Fig. S9-12  |
| TA spectral shifting .....          | Fig. S13    |
| Spectral fitting .....              | Fig. S14-33 |

## Device characteristics

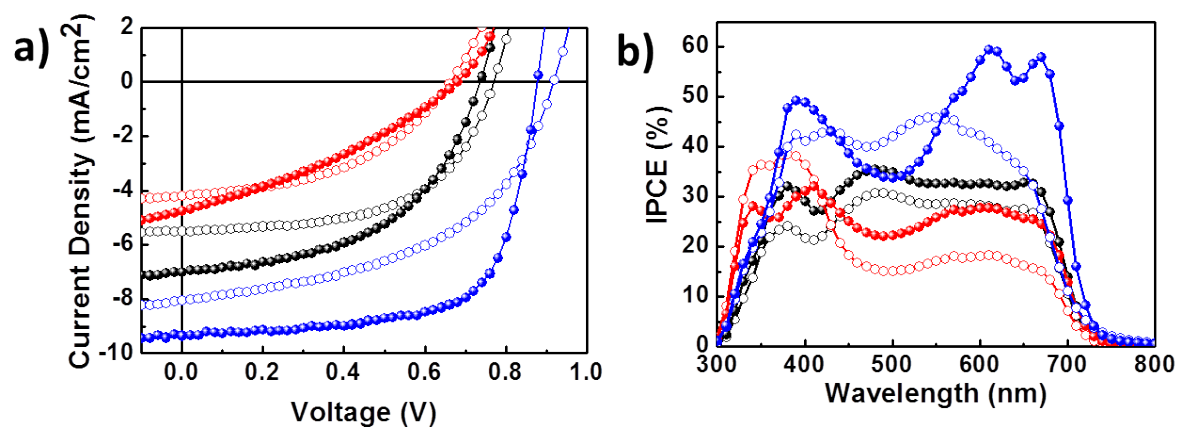

Fig. S 1 – Photovoltaic device characteristics for PTTBT:PCBM (black), PDTBT:PCBM (red) and PTBT:PCBM (blue) devices. (a)  $J$ - $V$  and (b) IPCE curves with (solid) and without processing additive (open).

## 2D-GIXRD

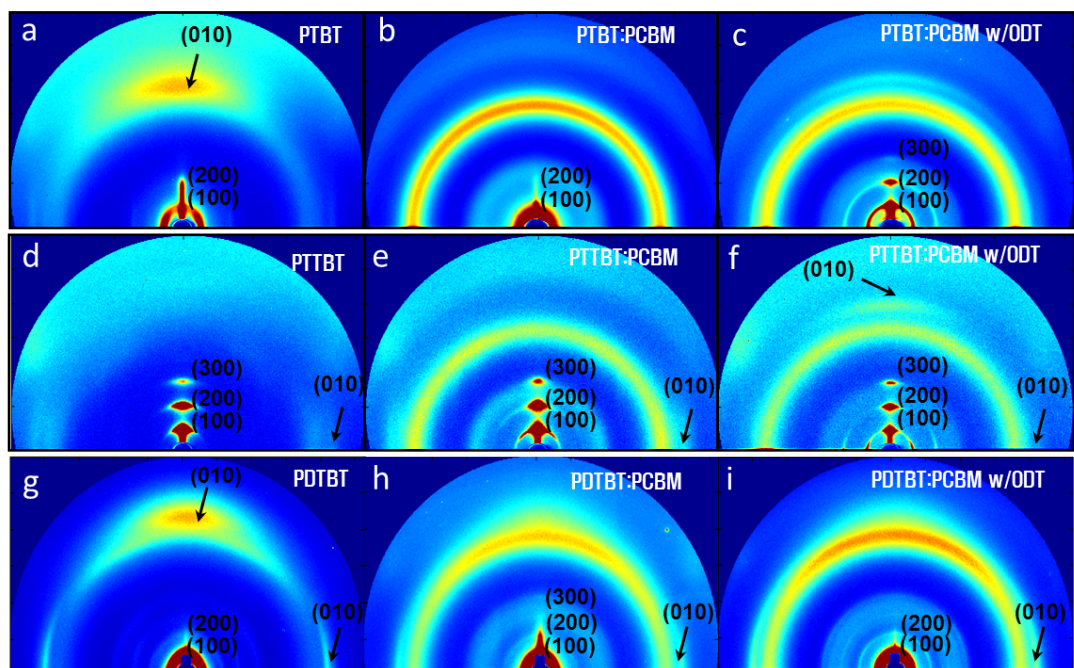

Fig. S 2 - 2D-GIXRD images of pristine and blended films with/without ODT for PTTBT, PDTBT and PTBT.

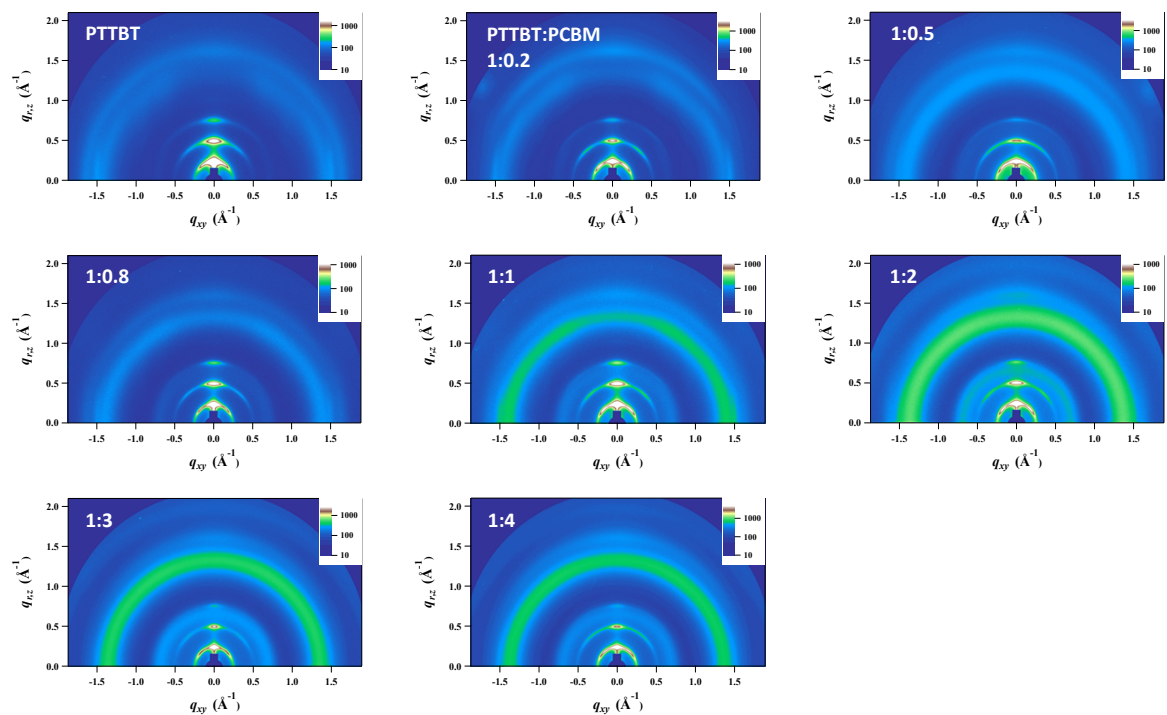

Fig. S 3. 2D-GIWAXS images of pristine PTBT and PTBT:PCBM (without ODT) with changing blend ratio

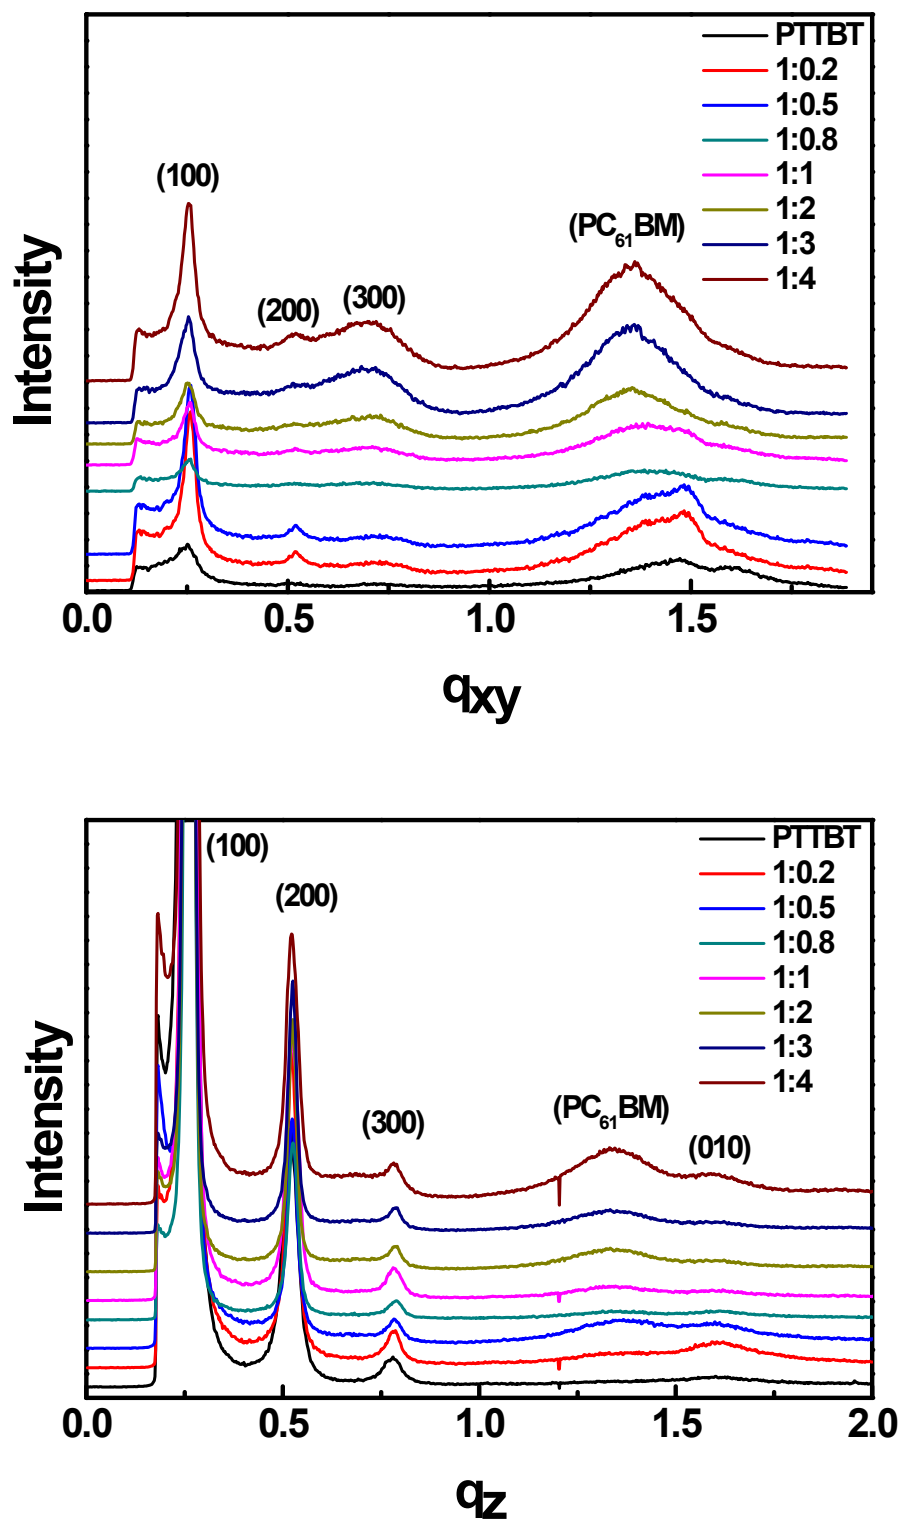

Fig S 4. In-plane (top) and out-of-plane (bottom) GIWAXS line-cuts for pristine and blended PTTBT, from the 2D images in Fig S3.

## Intensity dependent – Annihilation effects

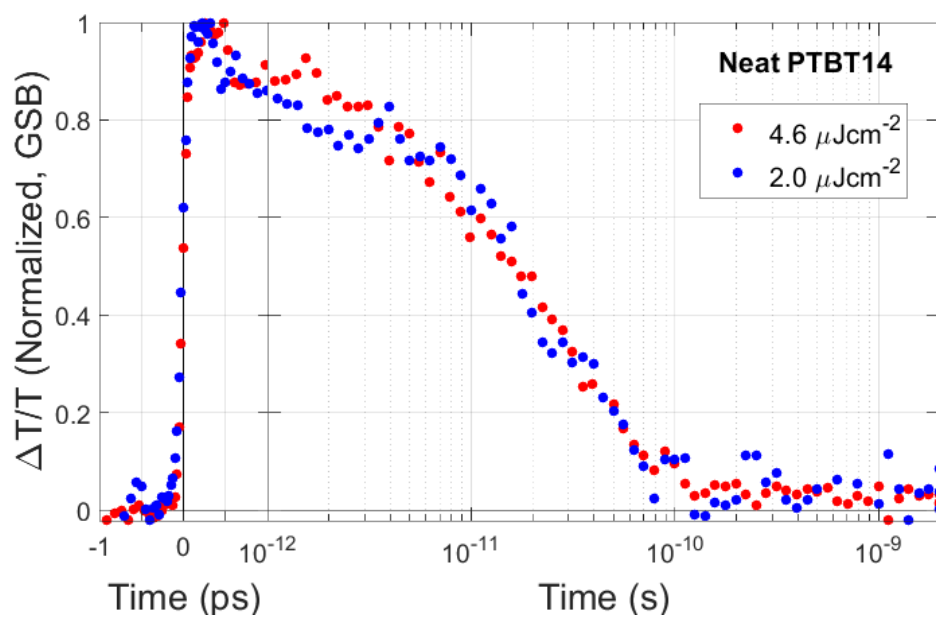

Fig. S 5 - Decay kinetics of neat PTBT14 at 2 different fluence, this is reminiscent of the data collected for all samples.

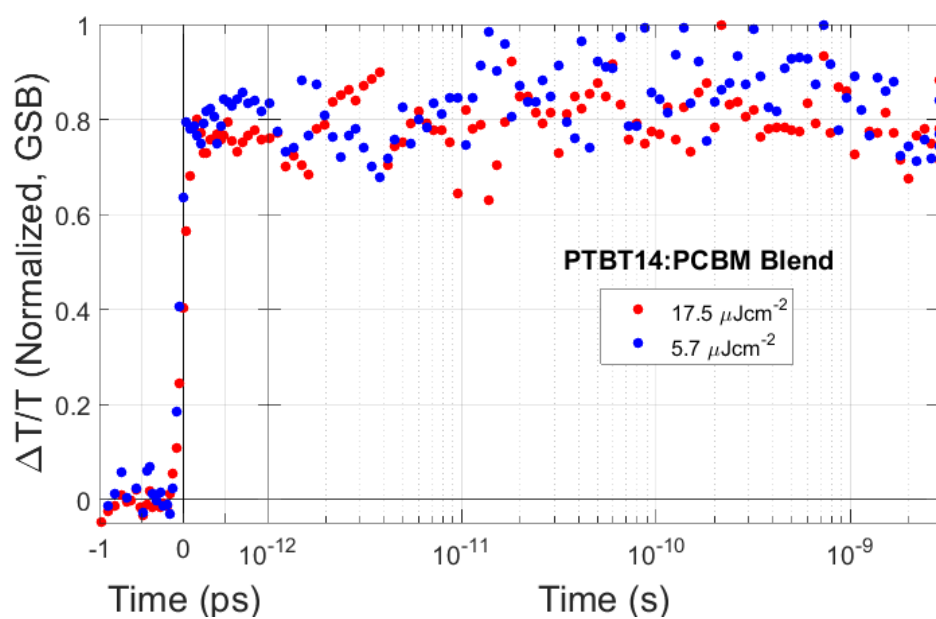

Fig. S 6 Decay kinetics of neat PTBT:PCBM at 2 different fluence, this is reminiscent of the data collected for all samples.

## Polymer:fullerene + ODT TA data

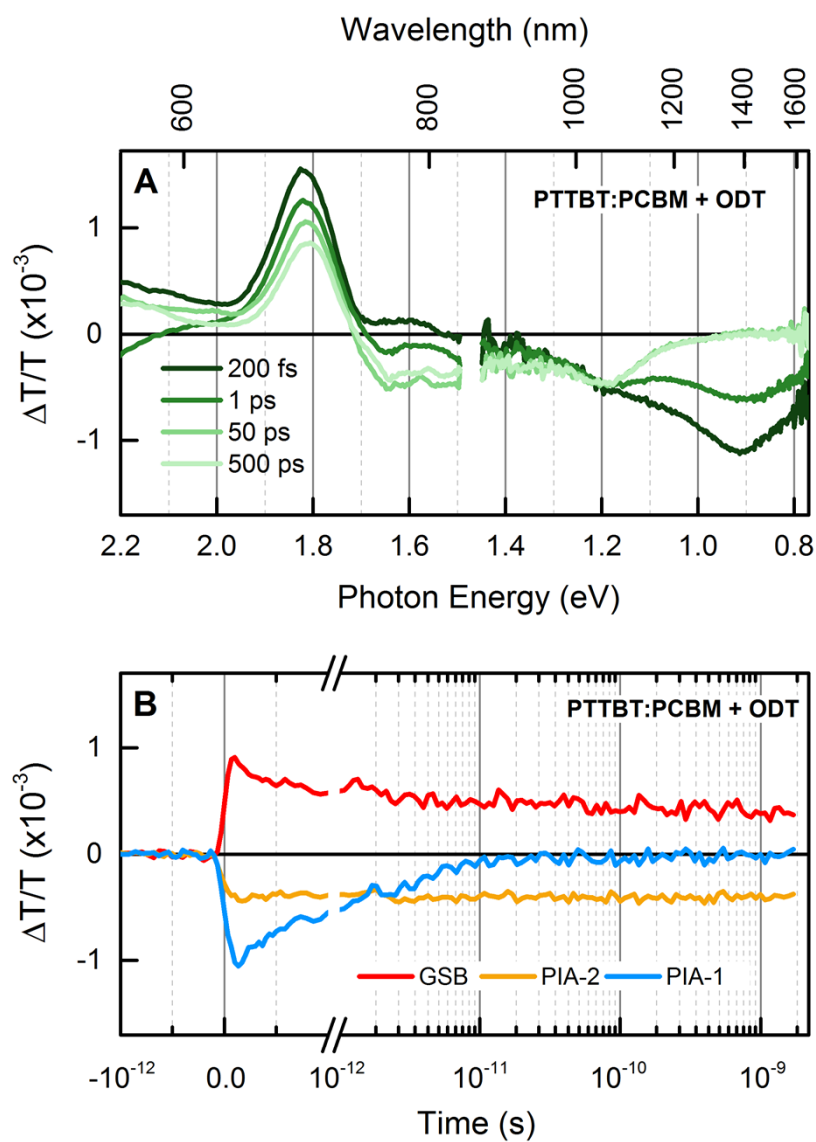

Fig. S 7 - TA spectra (A) and kinetics (B) of PTTBT:PCBM + ODT. Excitation wavelengths was 532 nm.

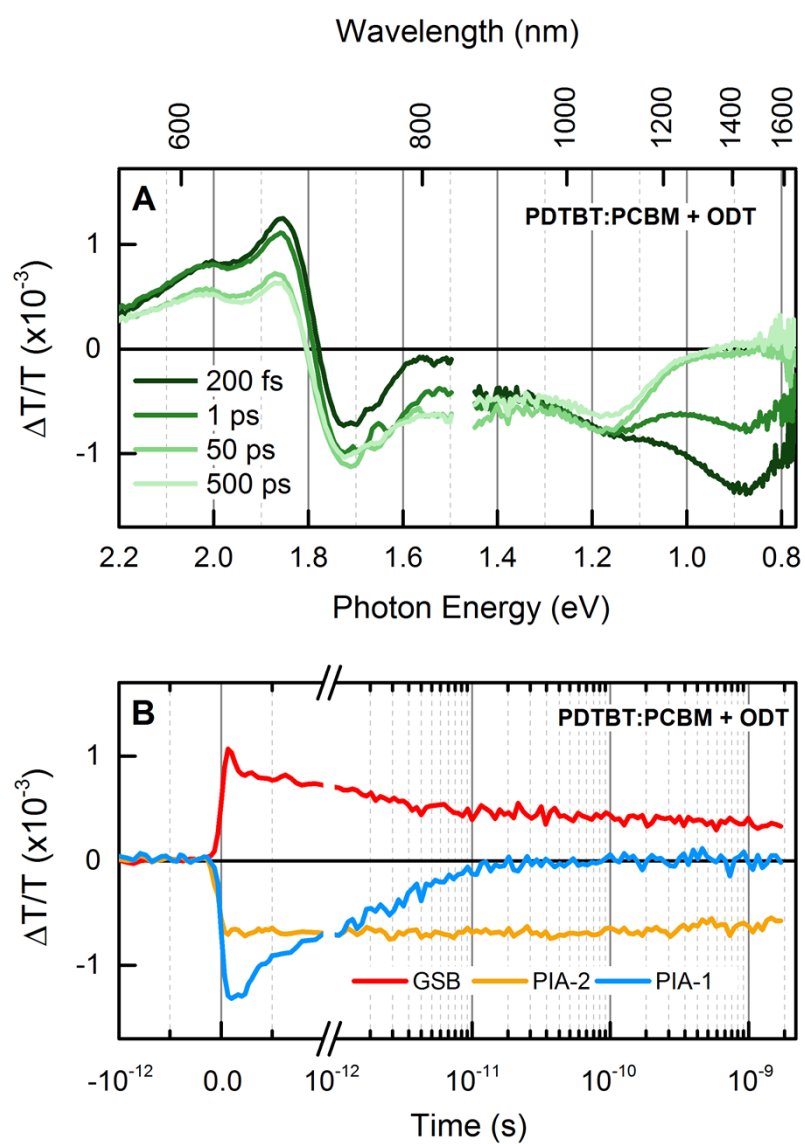

Fig. S 8 - TA spectra (A) and kinetics (B) of PDTBT:PCBM + ODT. Excitation wavelengths was 532 nm.

## Charge recombination intensity dependence

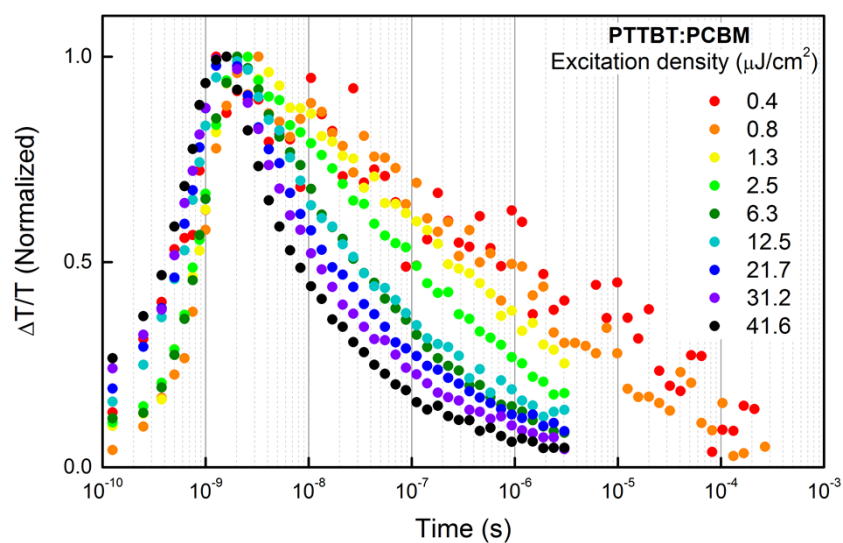

Fig. S 9 - Intensity dependent recombination for PTTBT:PCBM at the fluences indicated.

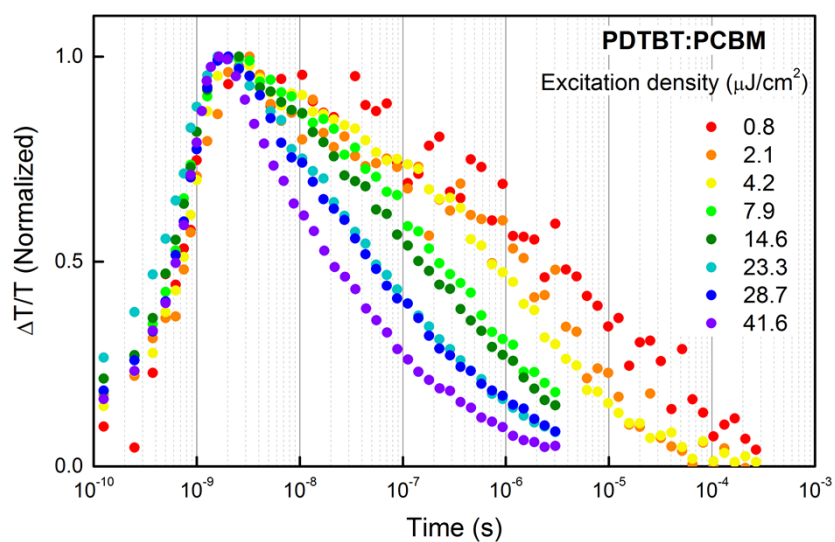

Fig. S 10 - Intensity dependent recombination for PDTBT:PCBM at the fluences indicated.



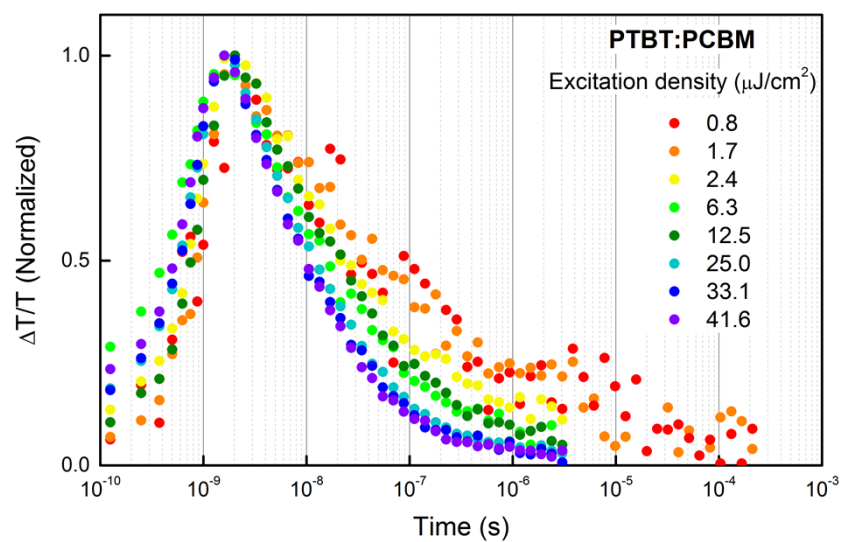

Fig. S 11 - Intensity dependent recombination for PTBT:PCBM at the fluences indicated.

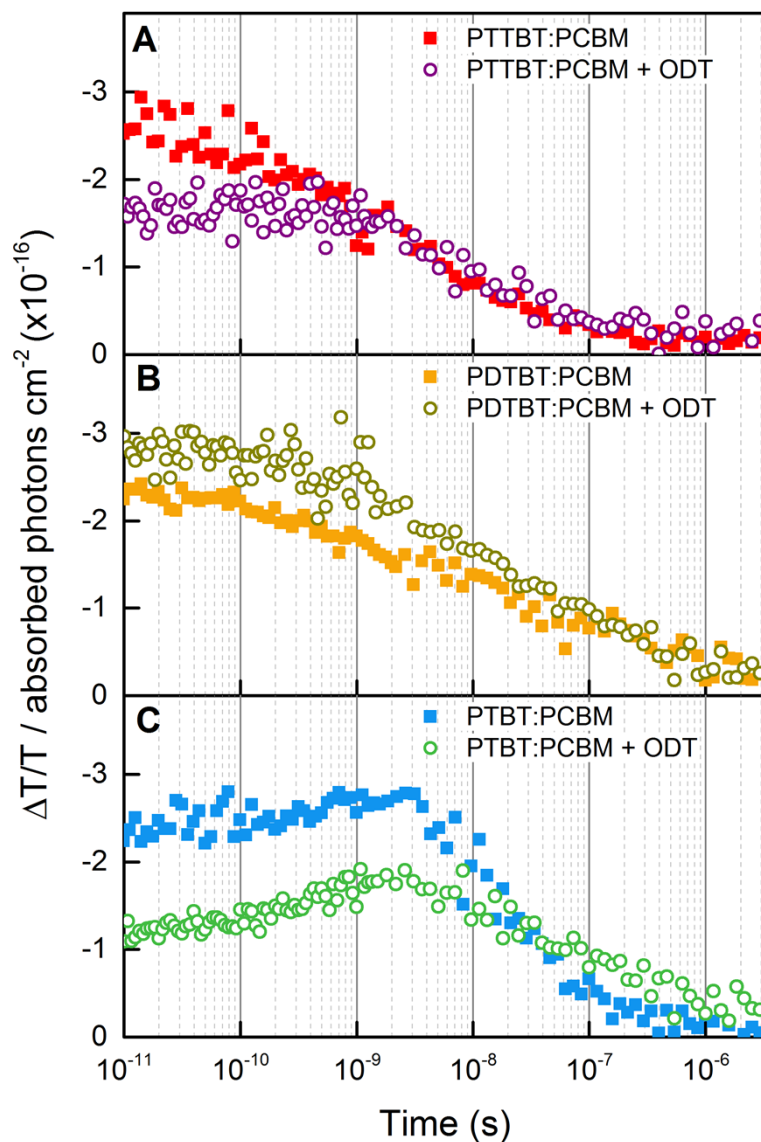

Fig. S 12 - Transient absorption recombination kinetics integrated over the 0.9 – 1.4 eV region for each polymer:PCBM processed with and without ODT additive. Each kinetic trace is normalised by absorbed photon flux ( $\text{photons}/\text{cm}^2$ ) to account for differences in optical density at the excitation wavelength (532 nm) of each sample. All kinetic decays were collected with an excitation fluence of approximately  $5 \mu\text{J cm}^{-2}$  allows comparison of intensity dependent decay dynamics. Spectral overlap of polarons with excitons is avoided by excluding the dynamics before 10 ps, at which time excitons have decayed.

## Spectral shift analysis

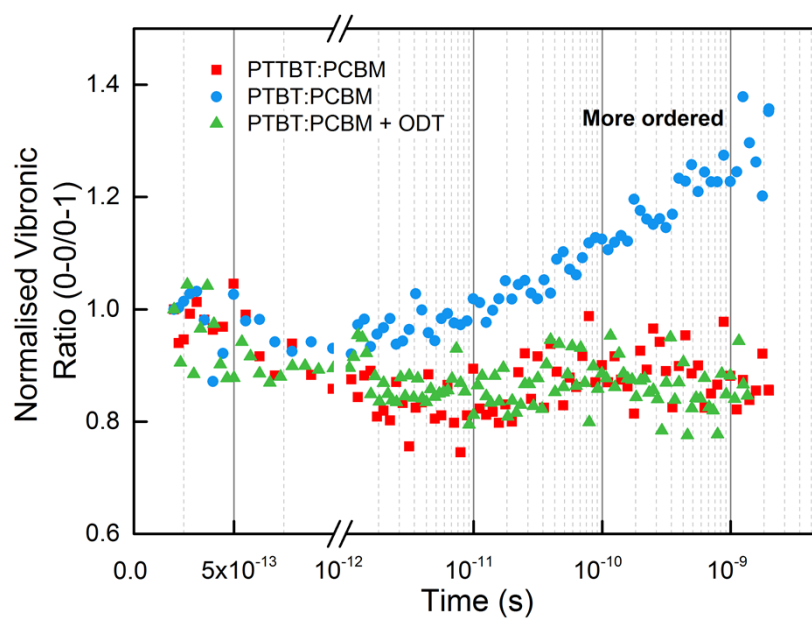

Fig. S 13 - Vibronic ratio (0-0/0-1) extracted from TA data for PTTBT:PCBM, and PTBT:PCBM with and without ODT as indicated

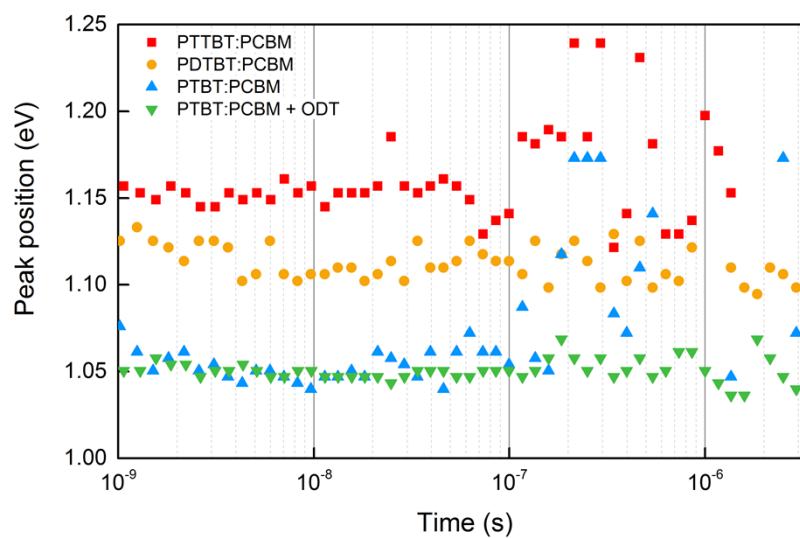

Fig. S 14 - Polaron peak position as a function of time during recombination.

## Spectral fitting

Fitting was achieved using a combination of two algorithms. Firstly, for fitting of the near-IR probe region  $>10$  ps (after exciton decay) we used soft-modelling, namely, evolving factor analysis and model-free multivariate curve resolution alternating least squares (MCR-ALS) algorithm.<sup>1,2</sup> The number of components required was guided by performing singular value decomposition and the constraint of non-negative concentration profiles was enforced. Secondly, fitting was performed for the time involving exciton decay ( $-1$  ps to  $1$  ns) for all polymer:fullerene blends. This was achieved by expanding the spectral basis set obtained using MCR-ALS to include a spectral component to account for the exciton contribution. Due to the short lifetime of the exciton in the polymer:fullerene blends, MCR-ALS would often not provide ample weighting to extract the exciton signature. To this end, we used a spectral slice from the TA surface of neat polymer as the third component whereby the excitation is solely the polymer exciton. The polymer:fullerene blend data from sub-picosecond to nanosecond was fit with every combination of neat polymer spectra using linear non-negative least squares (NNLSQ) and the minimum residual (using residual sum of square) was chosen as the optimum spectral basis set. These fitting procedures were performed for all polymer:fullerene blends. The details of the fits, i.e., spectral basis sets, relative component weightings, and residual surfaces, are presented below.

### 2-Phase morphology blends (PTTBT:PCBM and PDTBT:PCBM)

#### *PTTBT:PCBM blend*

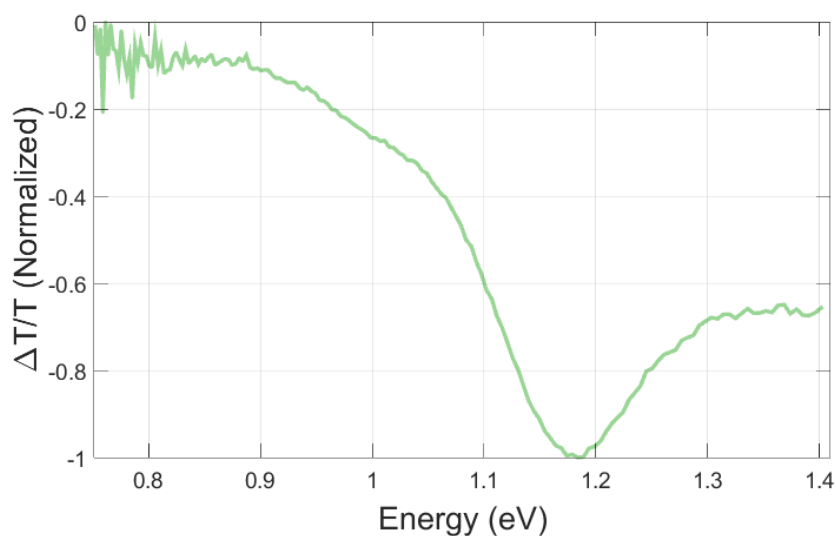

Fig. S 15 - Spectral component obtained from MCR-ALS for PTTBT:PCBM ( $>10$  ps)

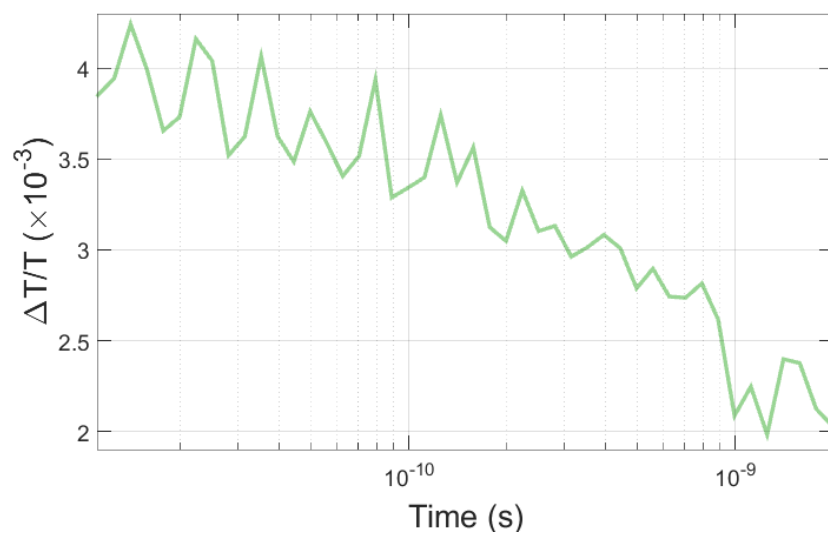

Fig. S 16 – Component weighting of the spectrum shown in Fig. S 13 using MCR-ALS fitting for PTTBT:PCBM (>10 ps)

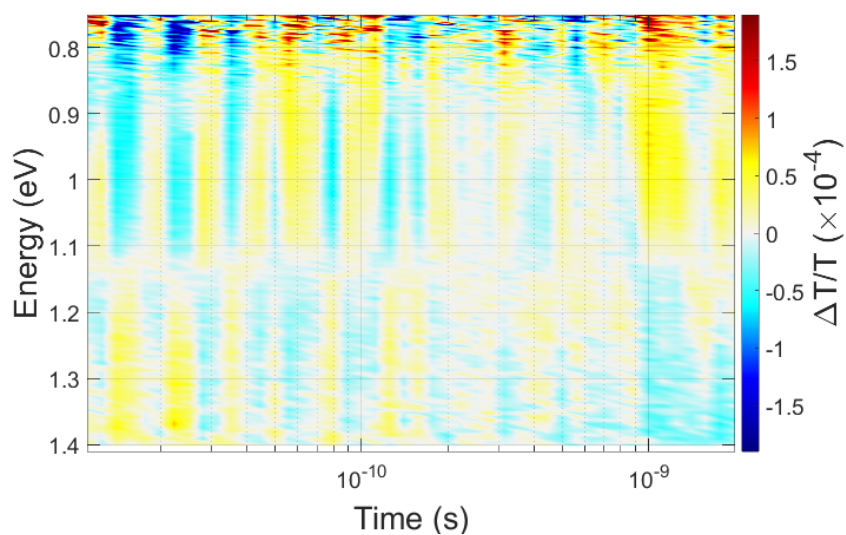

Fig. S 17 - Residual surface obtained from MCR-ALS for PTTBT:PCBM (>10 ps).

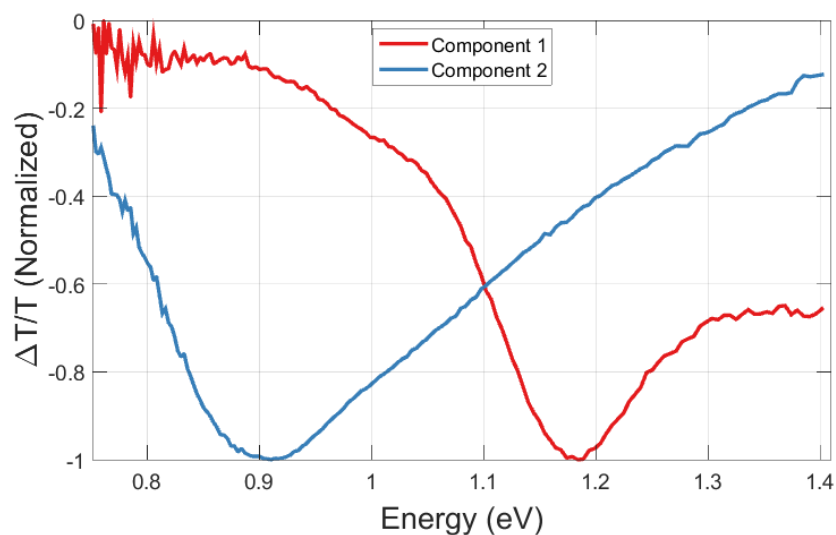

Fig. S 18 - Spectral basis set used for NNLSQ fitting of PTTBT:PCBM (-1ps to 1 ns timescales). Component 1 (polaron) is from MCR-ALS as shown in Fig. S 13. Component 2 (exciton) is obtained from neat PTTBT with the routine described above.

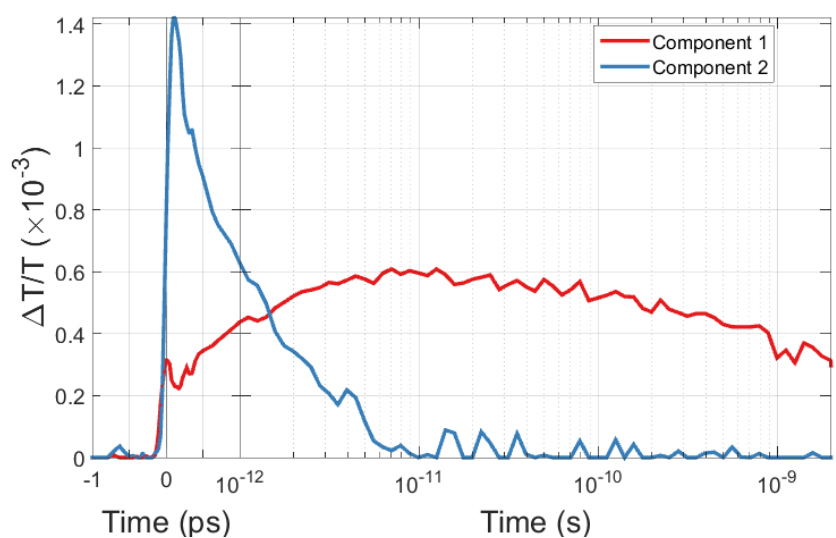

Fig. S 19 – Component weightings from NNLSQ of PTTBT:PCBM (-1ps to 1 ns timescales) using the spectral basis set presented in Fig. S 16.

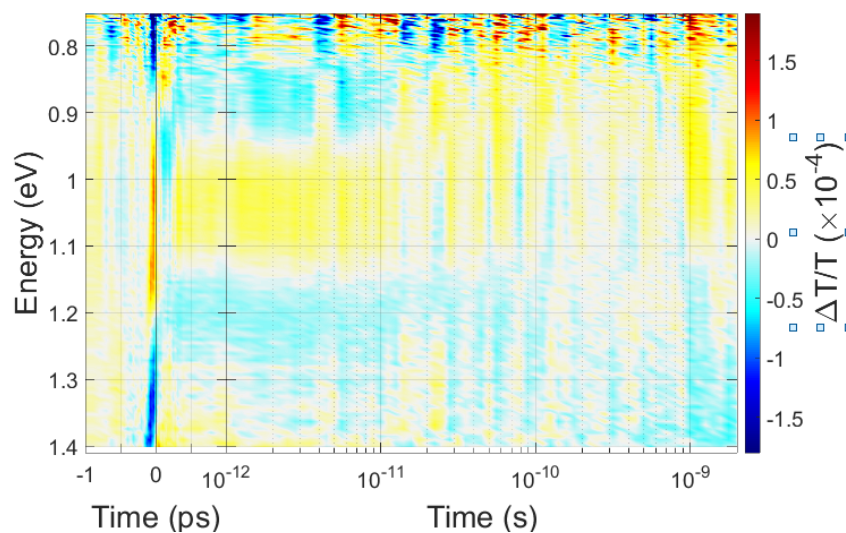

Fig. S 20 - Residual surface from NNLSQ of PTTBT:PCBM (-1ps to 1 ns timescales) using the spectral basis set presented in Fig. S 16.

*PDTBT:PCBM blend*

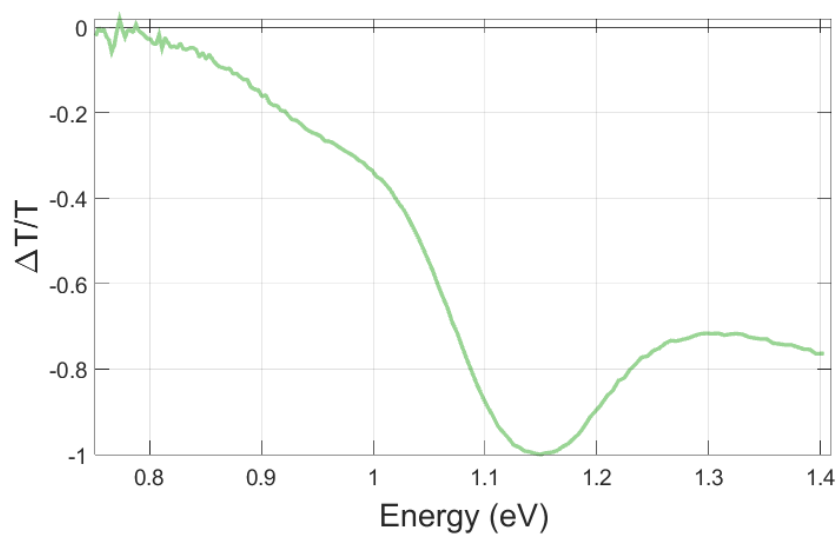

Fig. S 21 - Spectral component obtained from MCR-ALS for PDTBT:PCBM (>10 ps)

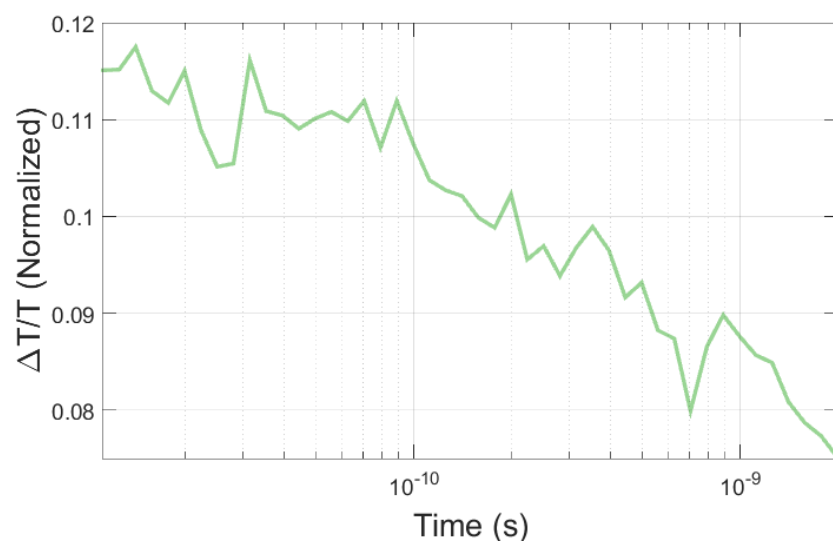

Fig. S 22 - Component weighting of the spectrum shown in Fig. S 19 using MCR-ALS fitting for PDTBT:PCBM (>10 ps)

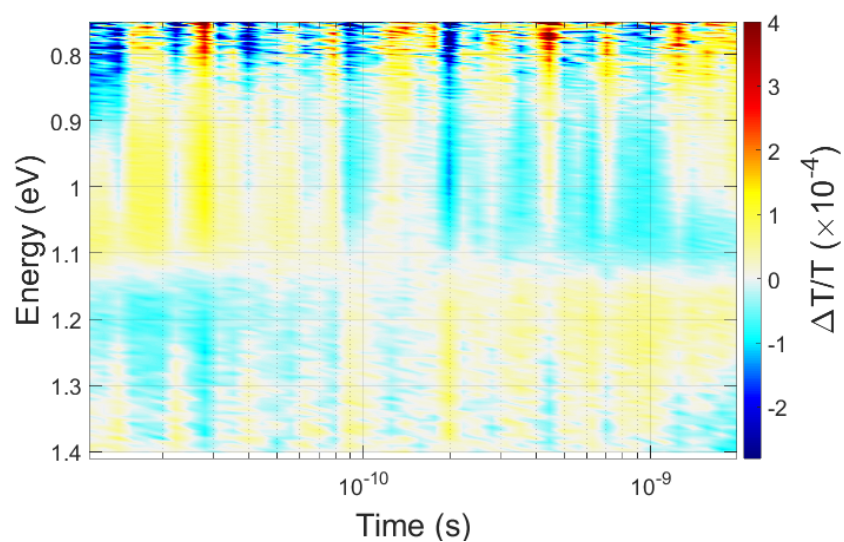

Fig. S 23 - Residual surface obtained from MCR-ALS for PDTBT:PCBM (>10 ps).



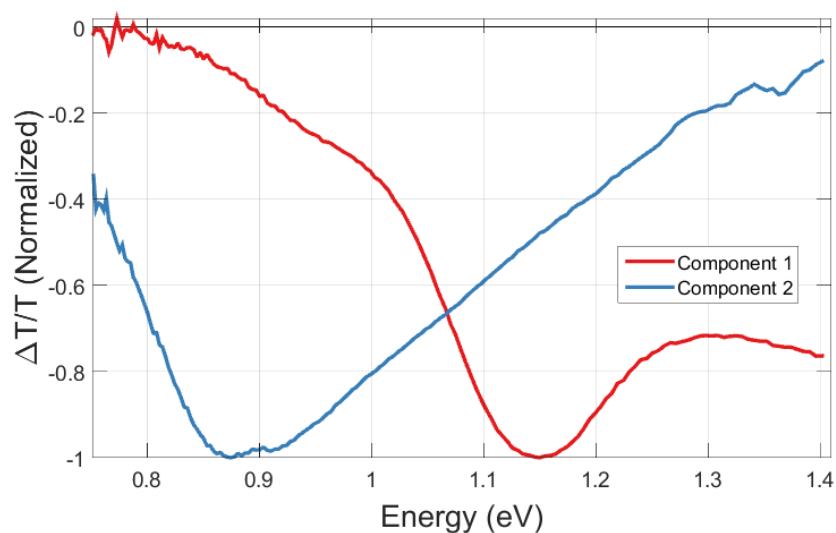

Fig. S 24 - Spectral basis set used for NNLSQ fitting of PDTBT:PCBM (-1ps to 1 ns timescales). Component 1 (polaron) is from MCR-ALS as shown in Fig. S 19. Component 2 (exciton) is obtained from neat PDTBT with the routine described above.

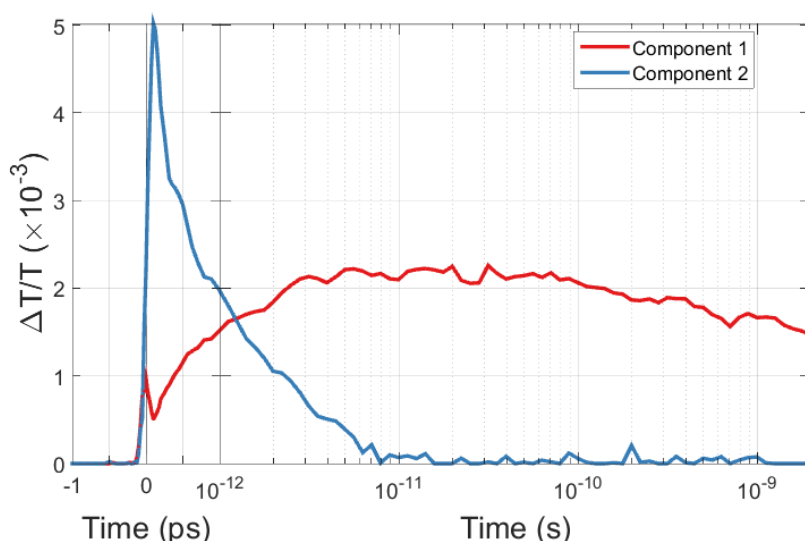

Fig. S 25 - Component weightings from NNLSQ of PDTBT:PCBM (-1ps to 1 ns timescales) using the spectral basis set presented in Fig. S 22.

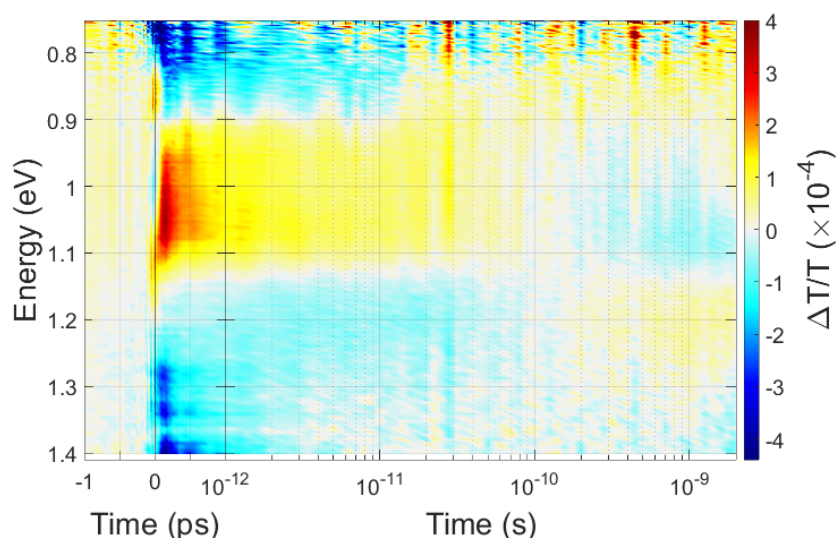

Fig. S 26 - Residual surface from NNLSQ of PDTBT:PCBM (-1ps to 1 ns timescales) using the spectral basis set presented in Fig. S 22.

### 3-phase morphology blends (PTBT:PCBM with and without ODT)

The TA surface (>10 ps, NIR probe) of PTBT:PCBM was concatenated in the probe photon energy dimension with PTBT:PCBM + ODT before performing the fitting procedures. The spectral basis set and relative weighting from MCR-ALS are presented in the manuscript with the residual surfaces presented here.

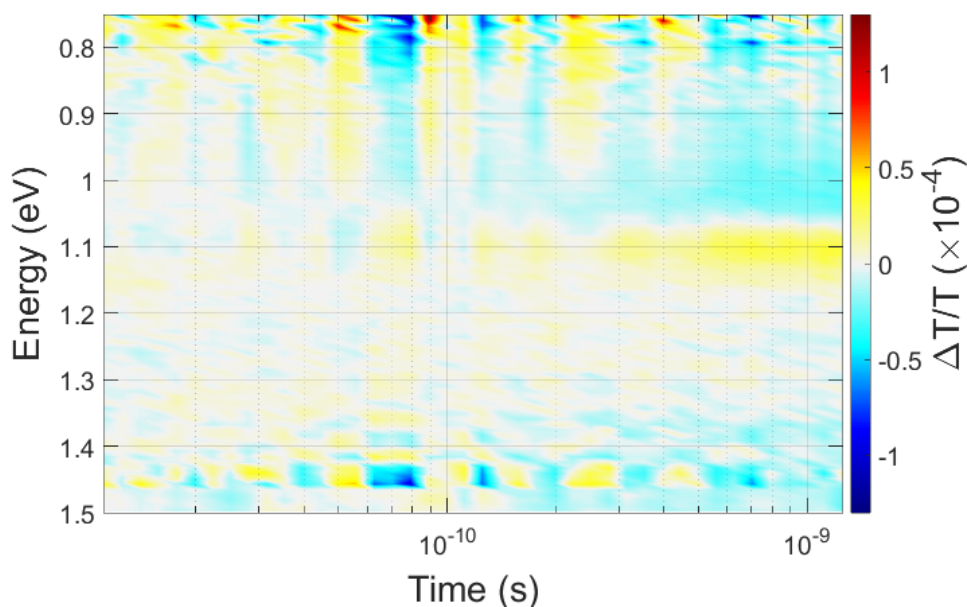

Fig. S 27 – Residual surface after MCR-ALS fitting using the two shape components reported in the text for PTBT:PCBM (>10 ps).

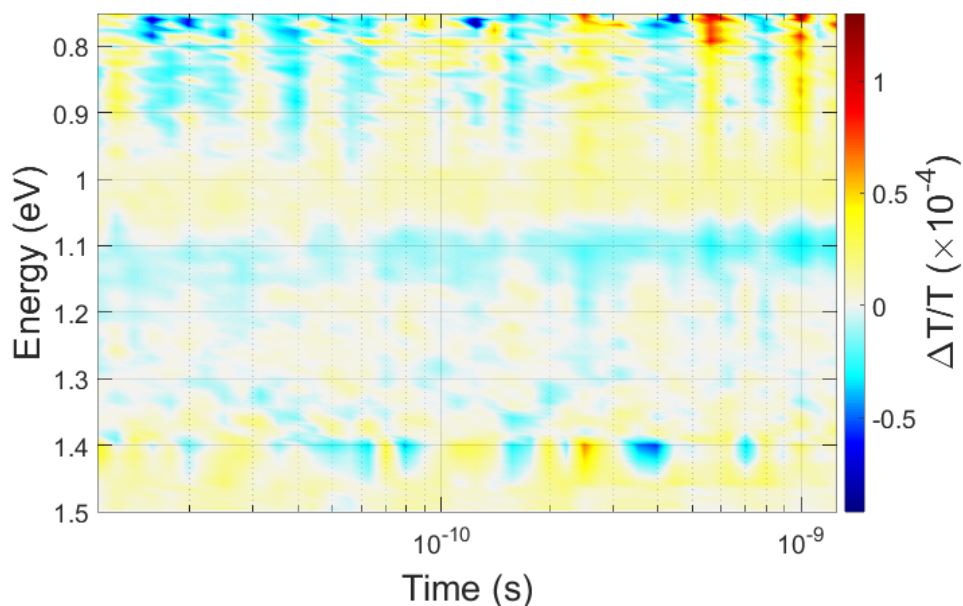

Fig. S 28 - Residual surface after MCR-ALS fitting using the two shape components reported in the text for PTBT:PCBM + ODT (>10 ps).

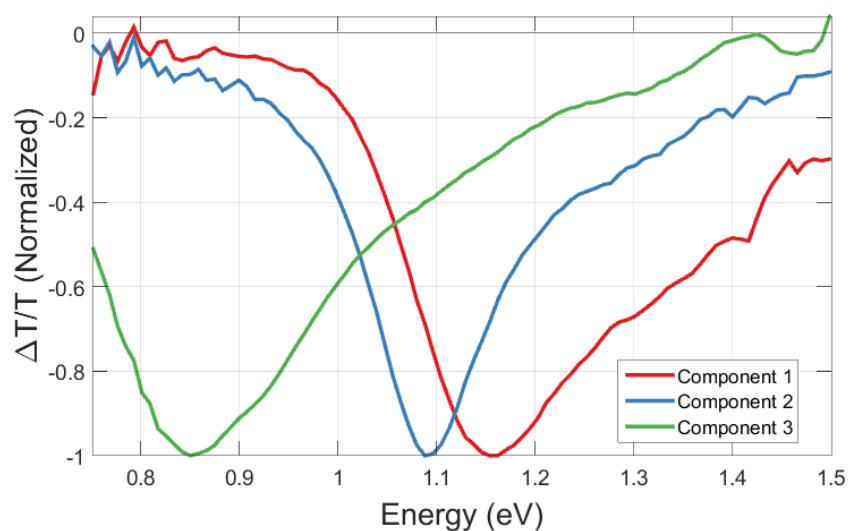

Fig. S 29- Spectral components used for non-negative linear least squares global fit of PTBT:PCBM (with and without ODT) for NIR probe photon energies over sub-picosecond to nanosecond timescales. Components 1 and 2 obtained from MCR-ALS, component 3 is a normalized component from neat polymer TA spectra.

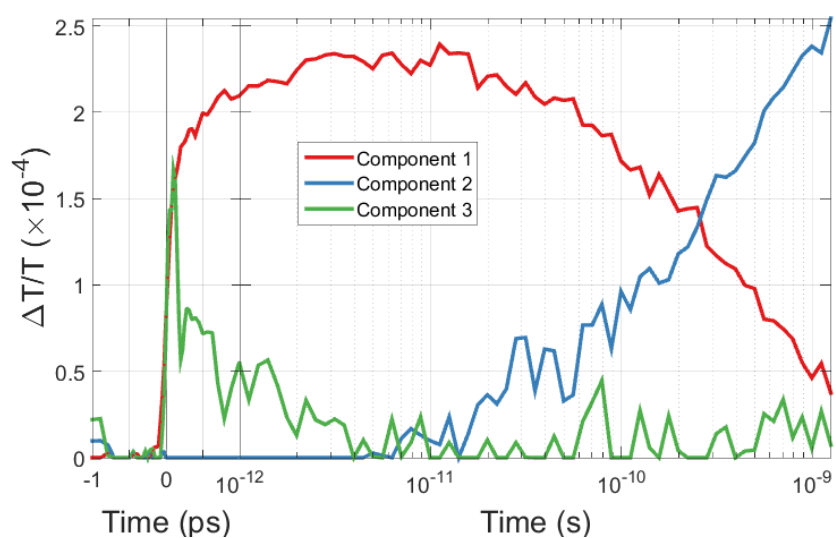

Fig. S 30 - Component weightings from a NNLSQ fit of the components in Fig. S 27 for PTBT:PCBM (-1ps to 1 ns timescales).

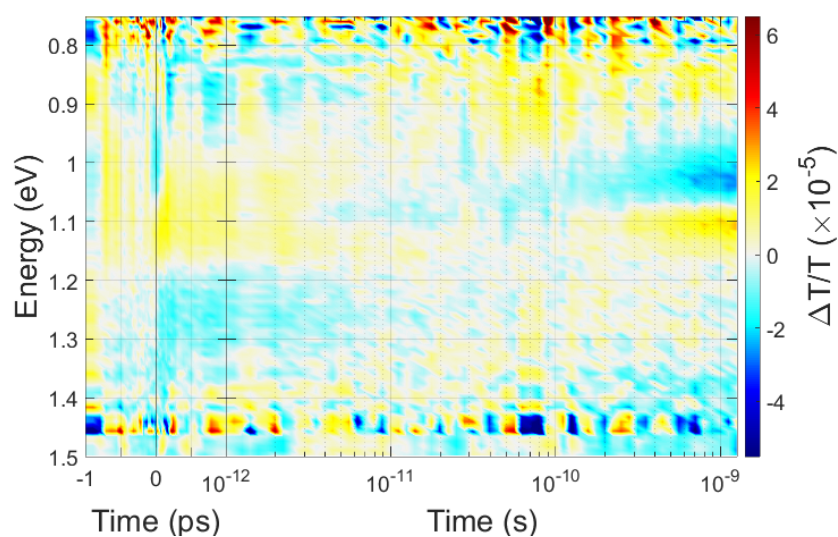

Fig. S 31 - Residuals from a NNLSQ fit of the components in Fig. S 27 for PTBT:PCBM (-1ps to 1 ns timescales).

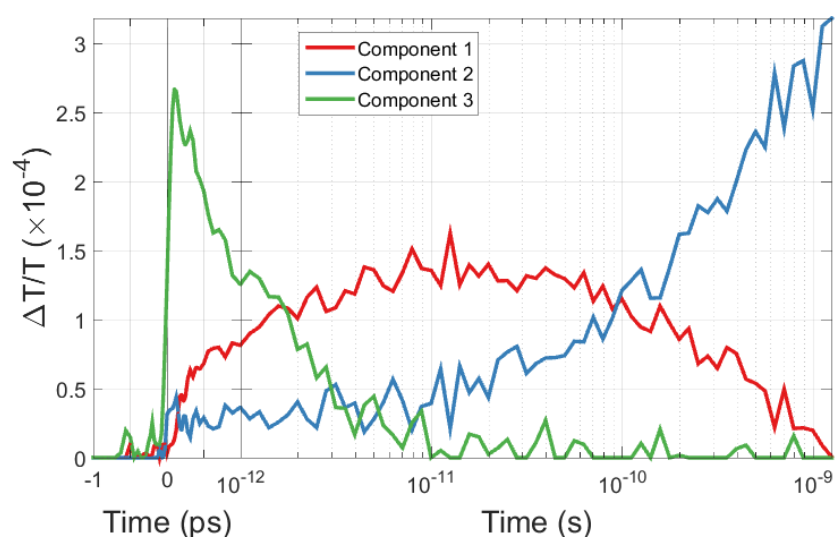

Fig. S 32 - Component weightings from a NNLSQ fit of the components in Fig. S 27 for PTBT:PCBM with ODT (-1ps to 1 ns timescales).

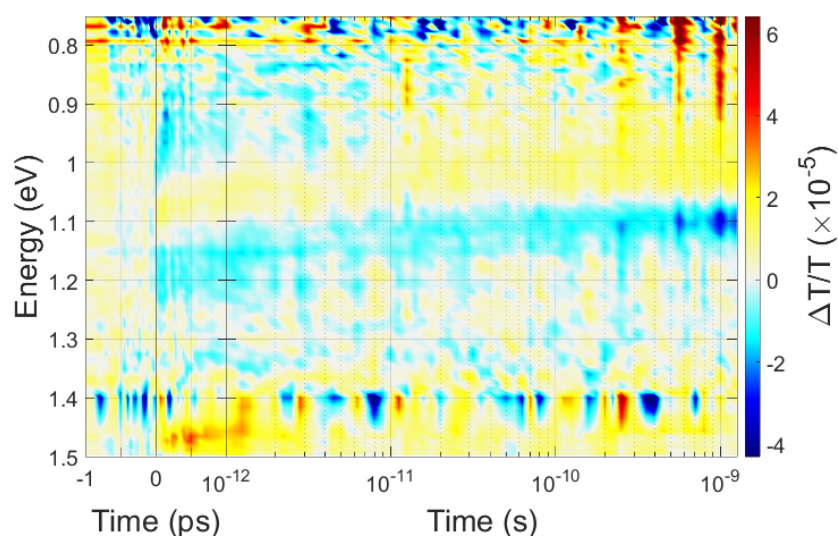

Fig. S 33 - Residuals from a NNLSQ fit of the components in Fig. S 27 for PTBT:PCBM with ODT (-1ps to 1 ns timescales).

## References

- 1 I. A. Howard, H. Mangold, F. Etzold, D. Gehig and F. Laquai, *Ultrafast Dynamics in Molecules, Nanostructures and Interfaces*, World Scientific, 2013.
- 2 J. Jaumot, A. de Juan and R. Tauler, *Chemom. Intell. Lab. Syst.*, 2015, **140**, 1–12.
